# Supplementary material
Source: ML conference proceedings conference paper supplement (https://proceedings.neurips.cc/paper_files/paper/2018/hash/bd1354624fbae3b2149878941c60df99-Abstract.html)
Supplement: Supplementary file [file bd1354624fbae3b2149878941c60df99-Supplemental.zip]

## A Proofs

### A.1 Proof of Theorem 1

The classification risk (1) can be expressed and decomposed as

$$\begin{aligned}
R(g) &= \sum_{y=\pm 1} \int \ell(yg(\mathbf{x}))p(\mathbf{x}|y)p(y)d\mathbf{x} \\
&= \int \ell(g(\mathbf{x}))p(\mathbf{x}|y=+1)p(y=+1)d\mathbf{x} + \int \ell(-g(\mathbf{x}))p(\mathbf{x}|y=-1)p(y=-1)d\mathbf{x} \\
&= \pi_+ \mathbb{E}_+[\ell(g(\mathbf{x}))] + \pi_- \mathbb{E}_-[\ell(-g(\mathbf{x}))], \tag{9}
\end{aligned}$$

where  $\pi_- = p(y = -1)$  and  $\mathbb{E}_-$  denotes the expectation over  $p(\mathbf{x}|y = -1)$ . Since

$$\begin{aligned}
\pi_+ p(\mathbf{x}|y = +1) + \pi_- p(\mathbf{x}|y = -1) &= p(\mathbf{x}, y = +1) + p(\mathbf{x}, y = -1) \\
&= p(\mathbf{x}) \\
&= \frac{p(\mathbf{x}, y = +1)}{p(y = +1|\mathbf{x})} \\
&= \frac{\pi_+ p(\mathbf{x}|y = +1)}{r(\mathbf{x})},
\end{aligned}$$

where the third equality requires the assumption of  $p(y = +1|\mathbf{x}) \neq 0$  stated in Theorem 1. we have

$$\pi_- p(\mathbf{x}|y = -1) = \pi_+ p(\mathbf{x}|y = +1) \left( \frac{1 - r(\mathbf{x})}{r(\mathbf{x})} \right).$$

Then the second term in (9) can be expressed as

$$\begin{aligned}
\pi_- \mathbb{E}_-[\ell(-g(\mathbf{x}))] &= \int \pi_- p(\mathbf{x}|y = -1) \ell(-g(\mathbf{x}))d\mathbf{x} \\
&= \int \pi_+ p(\mathbf{x}|y = +1) \left( \frac{1 - r(\mathbf{x})}{r(\mathbf{x})} \right) \ell(-g(\mathbf{x}))d\mathbf{x} \\
&= \pi_+ \mathbb{E}_+ \left[ \frac{1 - r(\mathbf{x})}{r(\mathbf{x})} \ell(-g(\mathbf{x})) \right],
\end{aligned}$$

which concludes the proof.  $\square$

### A.2 Proof of Lemma 2

By assumption, it holds almost surely that

$$\frac{1 - r(\mathbf{x})}{r(\mathbf{x})} \leq \frac{1}{C_r};$$

due to the existence of  $C_\ell$ , the change of  $\hat{R}(g)$  will be no more than  $(C_\ell + C_\ell/C_r)/n$  if some  $\mathbf{x}_i$  is replaced with  $\mathbf{x}'_i$ .

Consider a single direction of the uniform deviation:  $\sup_{g \in \mathcal{G}} \hat{R}(g) - R(g)$ . Note that the change of  $\sup_{g \in \mathcal{G}} \hat{R}(g) - R(g)$  shares the same upper bound with the change of  $\hat{R}(g)$ , and *McDiarmid's inequality* [27] implies that

$$\Pr \left\{ \sup_{g \in \mathcal{G}} \hat{R}(g) - R(g) - \mathbb{E}_{\mathcal{X}} \left[ \sup_{g \in \mathcal{G}} \hat{R}(g) - R(g) \right] \geq \epsilon \right\} \leq \exp \left( - \frac{2\epsilon^2 n}{(C_\ell + C_\ell/C_r)^2} \right),$$

or equivalently, with probability at least  $1 - \delta/2$ ,

$$\sup_{g \in \mathcal{G}} \hat{R}(g) - R(g) \leq \mathbb{E}_{\mathcal{X}} \left[ \sup_{g \in \mathcal{G}} \hat{R}(g) - R(g) \right] + \left( C_\ell + \frac{C_\ell}{C_r} \right) \sqrt{\frac{\ln(2/\delta)}{2n}}.$$

Since  $\widehat{R}(g)$  is unbiased, it is routine to show that [31]

$$\begin{aligned}\mathbb{E}_{\mathcal{X}} \left[ \sup_{g \in \mathcal{G}} \widehat{R}(g) - R(g) \right] &\leq 2\mathfrak{R}_n \left( \left( 1 + \frac{1-r}{r} \right) \circ \ell \circ \mathcal{G} \right) \\ &\leq 2 \left( 1 + \frac{1}{C_r} \right) \mathfrak{R}_n(\ell \circ \mathcal{G}) \\ &\leq 2 \left( L_\ell + \frac{L_\ell}{C_r} \right) \mathfrak{R}_n(\mathcal{G}),\end{aligned}$$

which proves this direction.

The other direction  $\sup_{g \in \mathcal{G}} R(g) - \widehat{R}(g)$  can be proven similarly. □

### A.3 Proof of Theorem 3

Based on Lemma 2, the estimation error bound (7) is proven through

$$\begin{aligned}R(\hat{g}) - R(g^*) &= \left( \widehat{R}(\hat{g}) - \widehat{R}(g^*) \right) + \left( R(\hat{g}) - \widehat{R}(\hat{g}) \right) + \left( \widehat{R}(g^*) - R(g^*) \right) \\ &\leq 0 + 2 \sup_{g \in \mathcal{G}} |\widehat{R}(g) - R(g)| \\ &\leq 4 \left( L_\ell + \frac{L_\ell}{C_r} \right) \mathfrak{R}_n(\mathcal{G}) + 2 \left( C_\ell + \frac{C_\ell}{C_r} \right) \sqrt{\frac{\ln(2/\delta)}{2n}},\end{aligned}$$

where  $\widehat{R}(\hat{g}) \leq \widehat{R}(g^*)$  by the definition of  $\widehat{R}$ . □

## B Neural Network Architectures used in Section 4.2

### B.1 CNN architecture

- Convolution (3 in- /18 out-channels, kernel size 5).
- Max-pooling (kernel size 2, stride 2).
- Convolution (18 in- /48 out-channels, kernel size 5).
- Max-pooling (kernel size 2, stride 2).
- Fully-connected (800 units) with ReLU.
- Fully-connected (400 units) with ReLU.
- Fully-connected (1 unit).

### B.2 AutoEncoder Architecture

- Convolution (3 in- /18 out-channels, kernel size 5, stride 1) with ReLU.
- Max-pooling (kernel size 2, stride 2).
- Convolutional layer (18 in- /48 out-channels, kernel size 5, stride 1) with ReLU.
- Max-pooling (kernel size 2, stride 2).
- Deconvolution (48 in- /18 out-channels, kernel size 5, stride 2) with ReLU.
- Deconvolution (18 in- /5 out-channels, kernel size 5, stride 2).
- Deconvolution (5 in- /3 out-channels, kernel size 4, stride 1) with Tanh.
